# Supplementary material for: Condensed Fukui function predicts innate C–H radical functionalization sites on multi-nitrogen containing fused arenes
Source: Royal Society of Chemistry journal article supplement (doi:10.1039/c4ra01853b), 2014-01-01
Supplement: c4ra01853b2.pdf [file c4ra01853b2.pdf]

## SUPPORTING INFORMATION

### Condensed Fukui Function Predicts Innate C-H Radical Functionalization Sites On Multi-nitrogen Containing Fused Arenes

Yuchi Ma,<sup>a,#</sup> Jin Liang,<sup>a,b,#</sup> Dongmei Zhao,<sup>b</sup> Yue-Lei Chen,<sup>\*a</sup> Jingkang Shen,<sup>\*a</sup> and Bing Xiong<sup>\*a</sup>

<sup>a</sup> Shanghai Institute of Materia Medica, Chinese Academy of Sciences, 555 Zuchongzhi Road, Shanghai 201203, P. R. China.

<sup>b</sup> School of Pharmaceutical Engineering, Shenyang Pharmaceutical University, 103 Wenhua Road, Shenyang 100016, P. R. China.

E-mail: Y. -L. C: [chenyuelei@gmail.com](mailto:chenyuelei@gmail.com), B. X.: [bxiong@simm.ac.cn](mailto:bxiong@simm.ac.cn)

#### Table of Contents

|                                                |      |
|------------------------------------------------|------|
| <sup>1</sup> H and <sup>13</sup> C NMR spectra | 2-10 |
|------------------------------------------------|------|

### 7-isopropyl-imidazo[1,2-b]pyridazine (15)

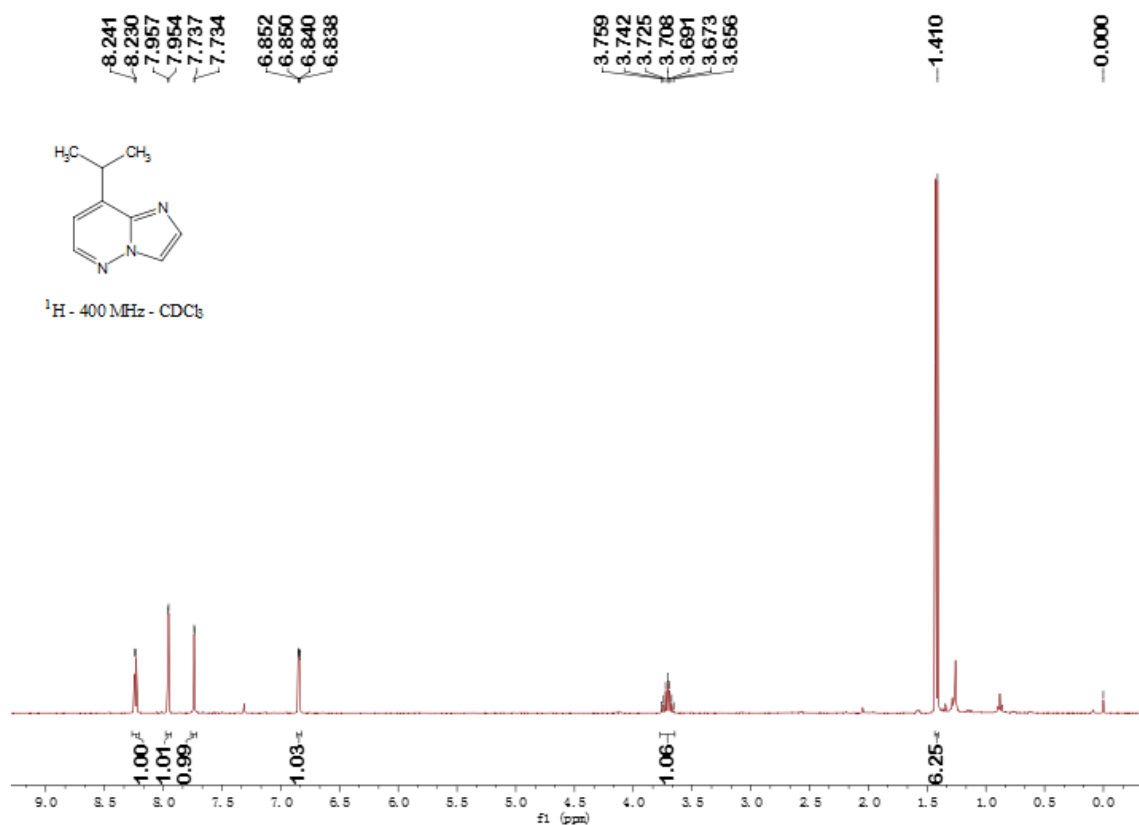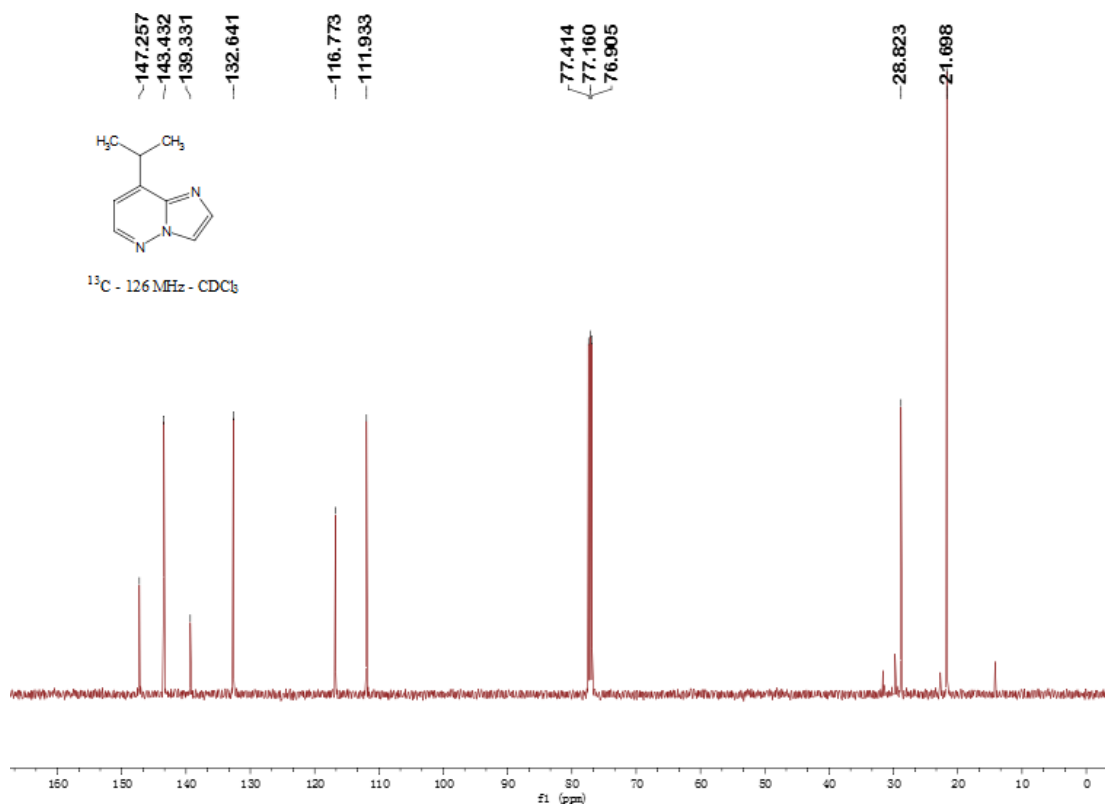

### 4-isopropyl-1H-pyrrolo[2,3-d]pyrimidine (**16**)

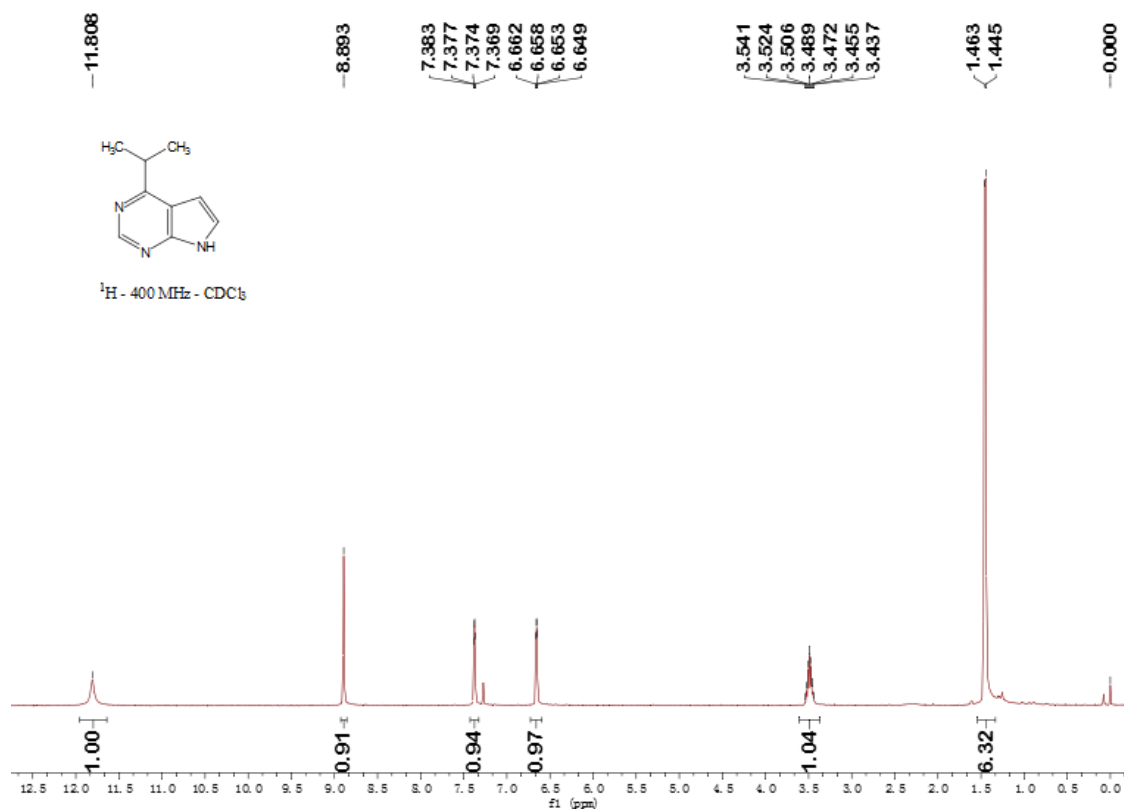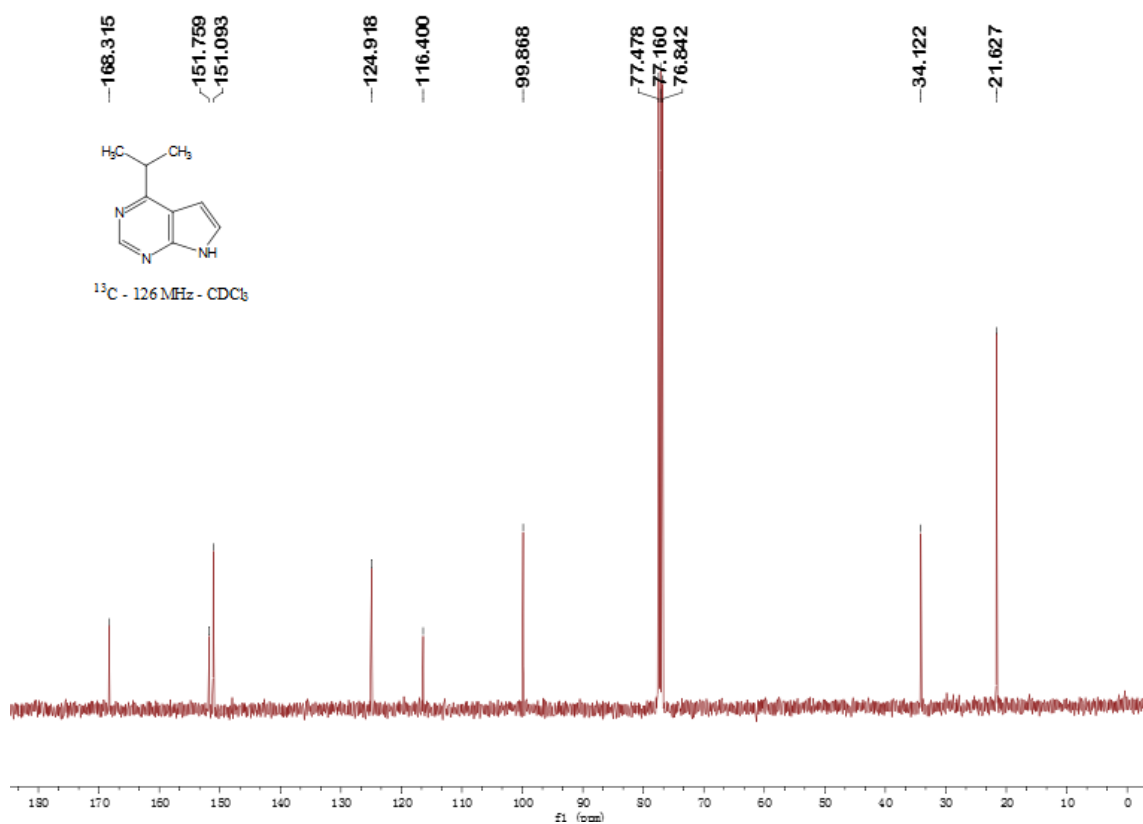

### 1H-pyrazolo[3,4-b]pyridine (9)

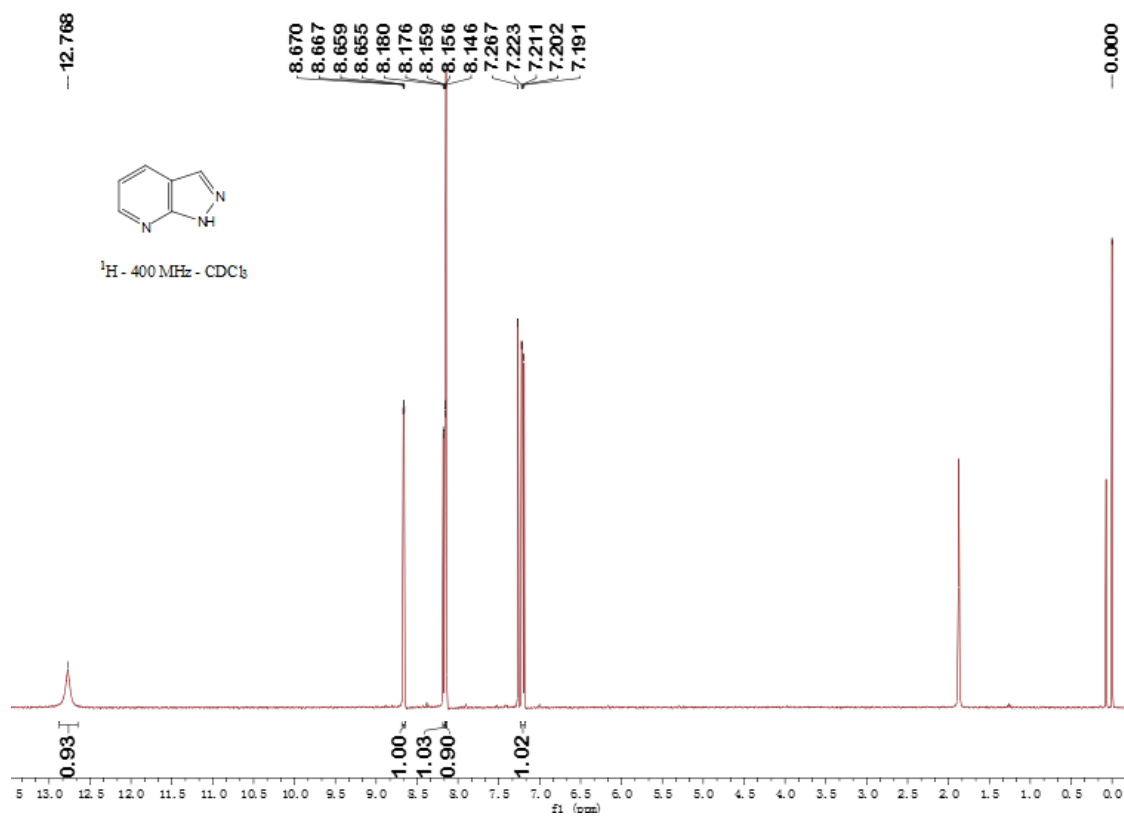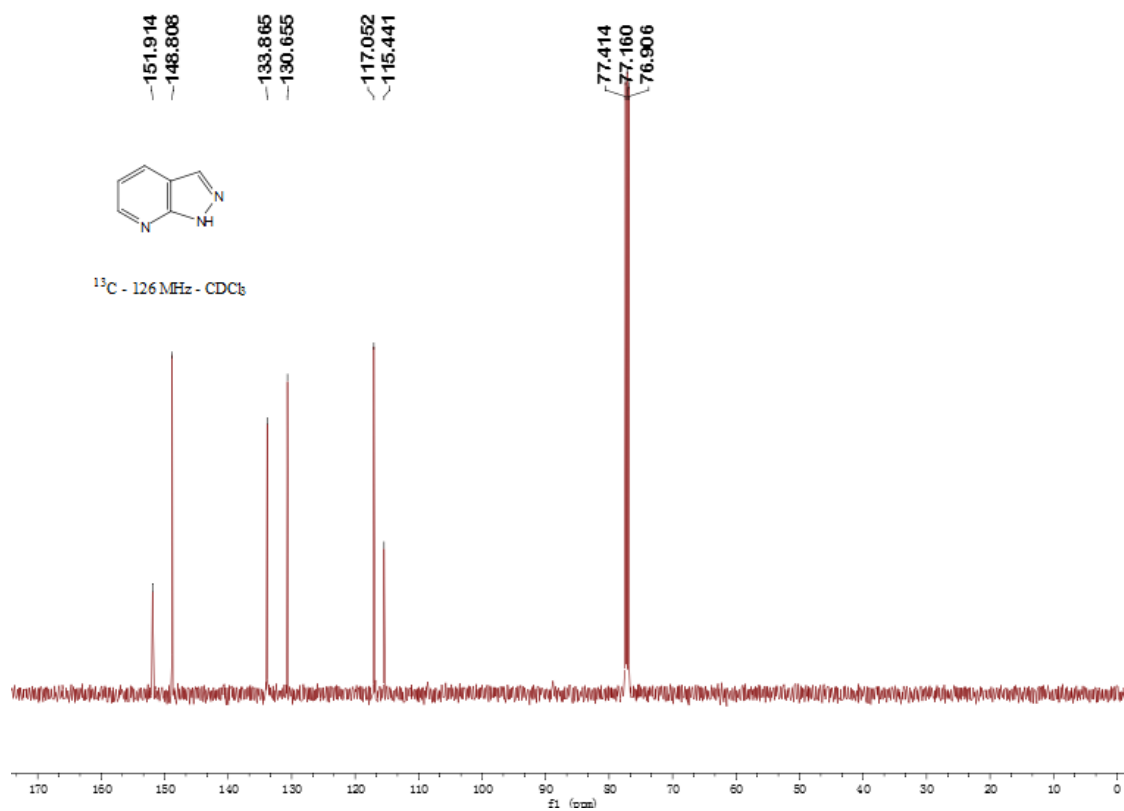

4-isopropyl-1H-pyrazolo[3,4-b]pyridine (**17**, containing 33% of inseparable starting material **9**)

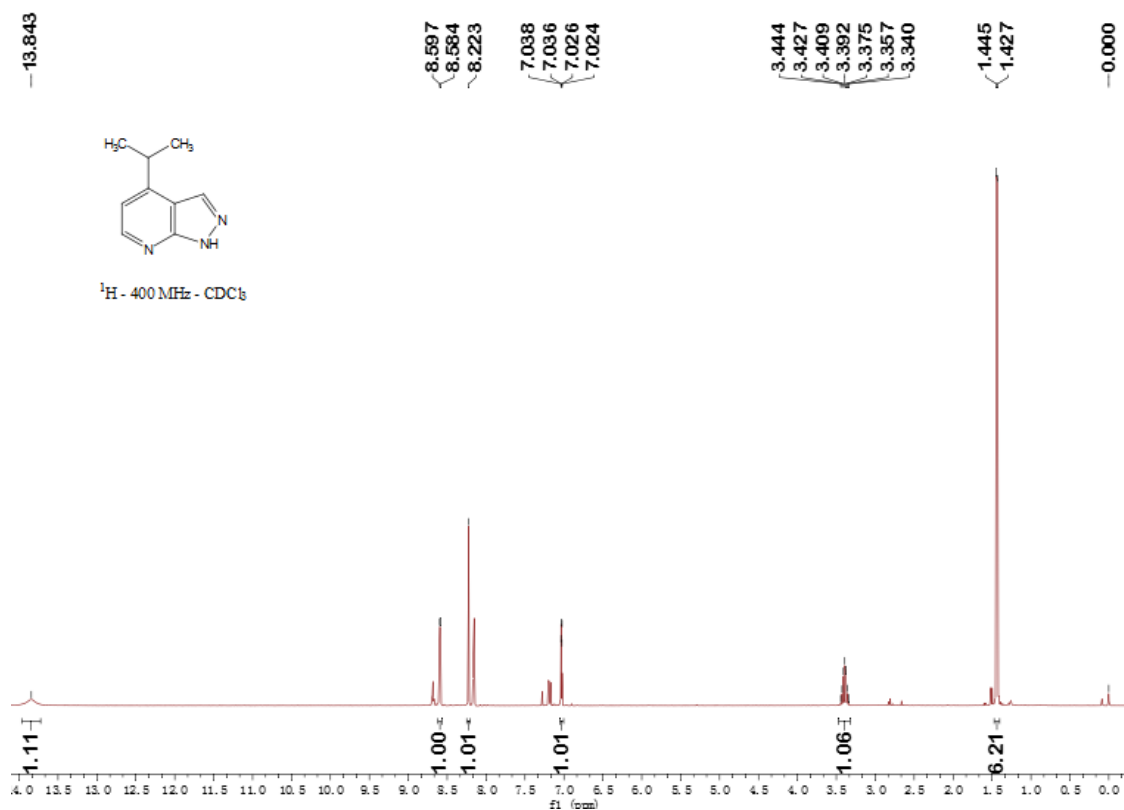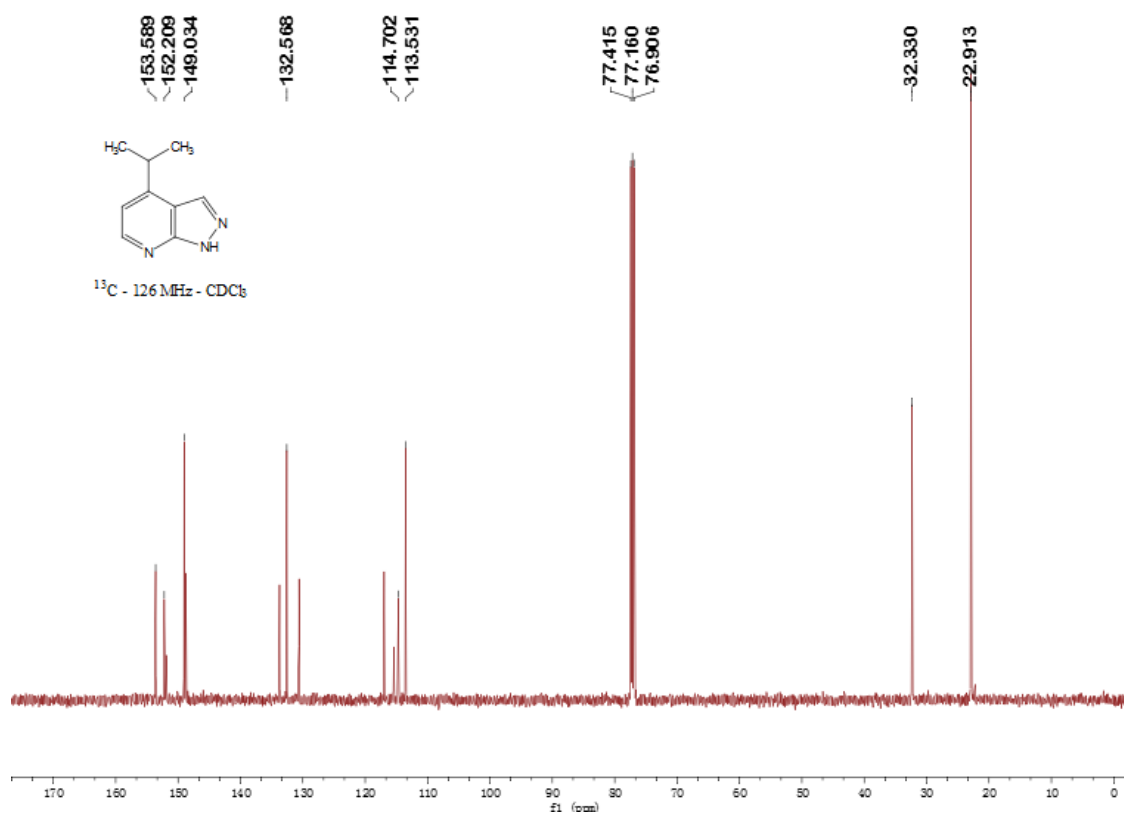

### 7-isopropyl-1H-pyrazolo[3,4-c]pyridine (**18**)

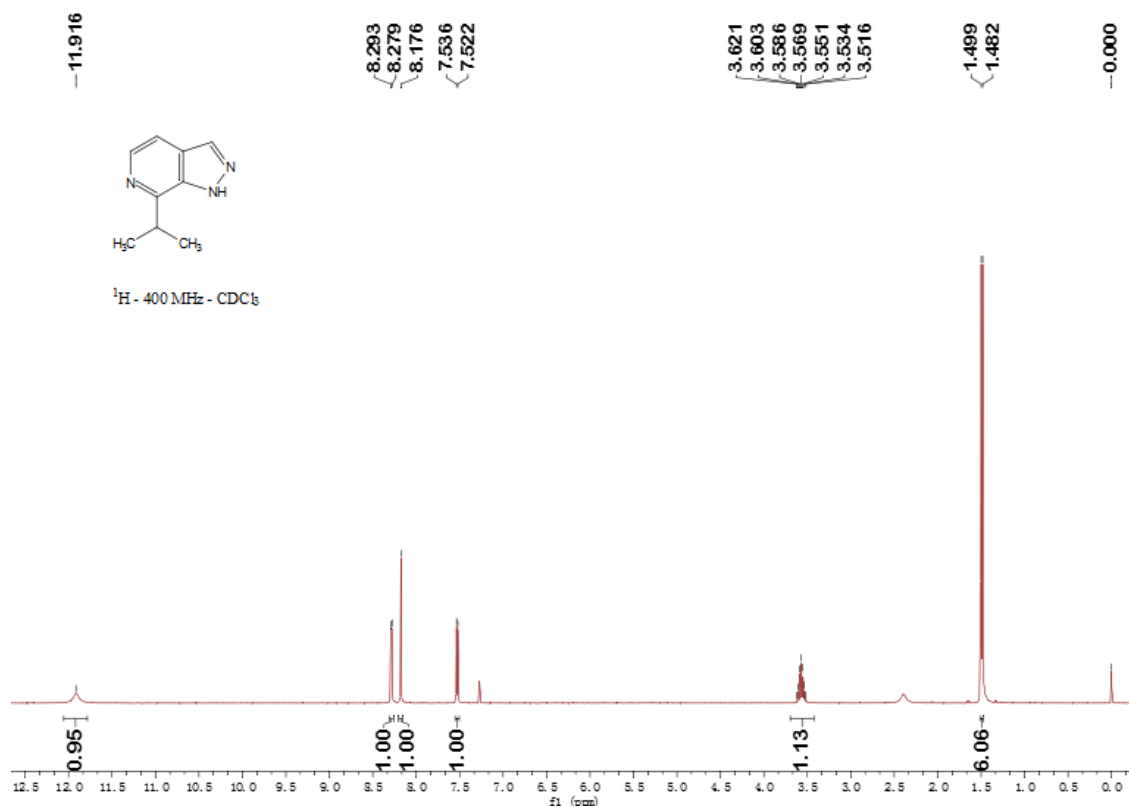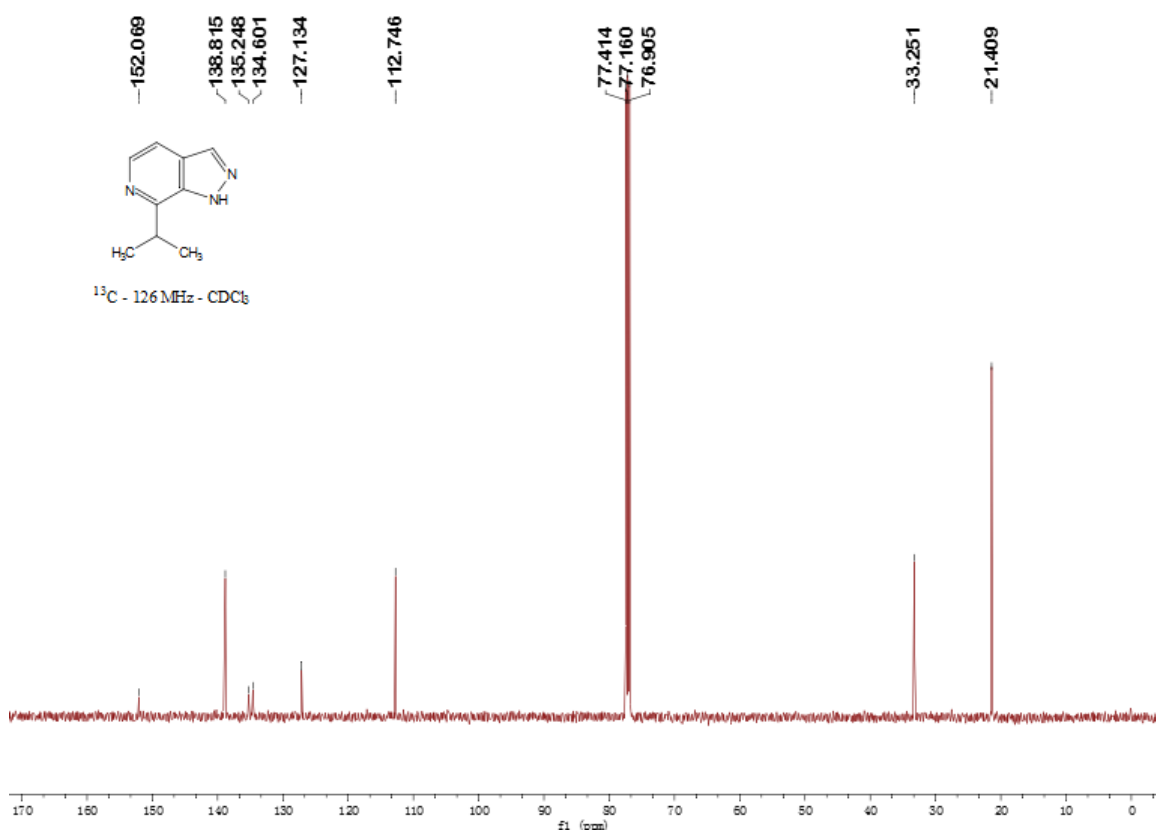

### 7-isopropyl-1H-pyrazolo[4,3-b]pyridine (**19**)

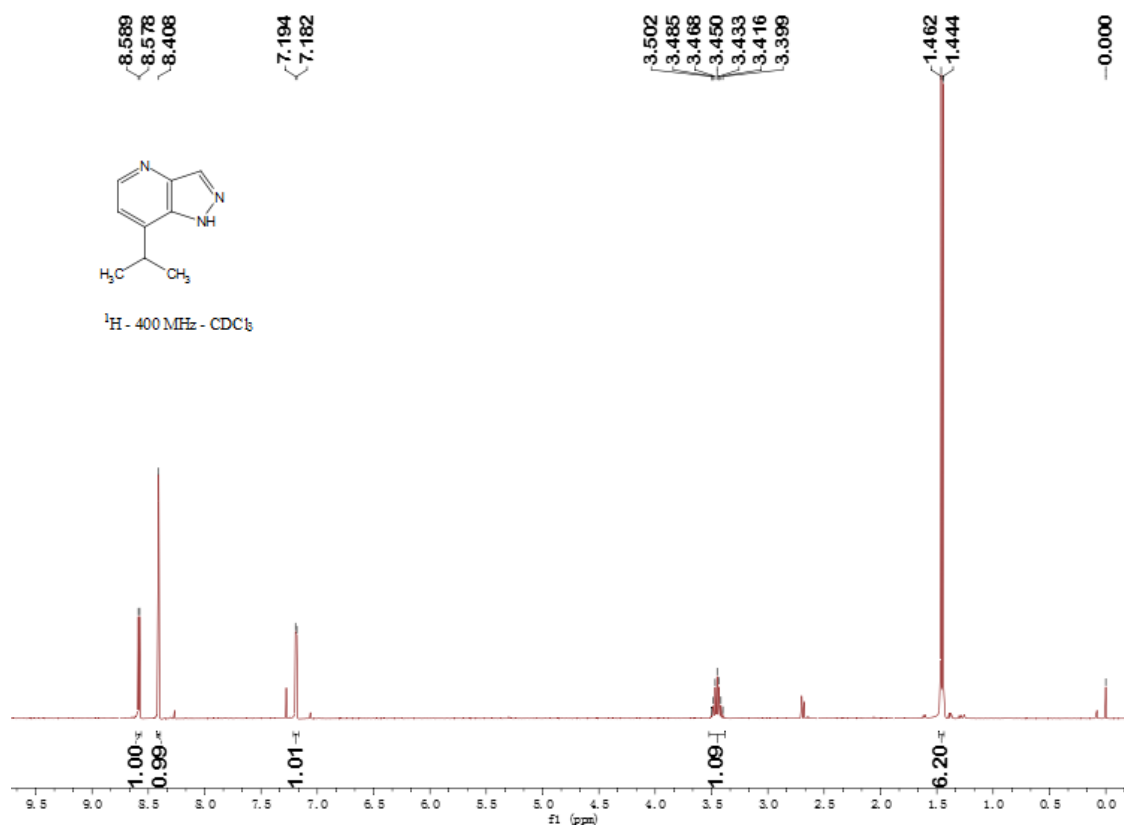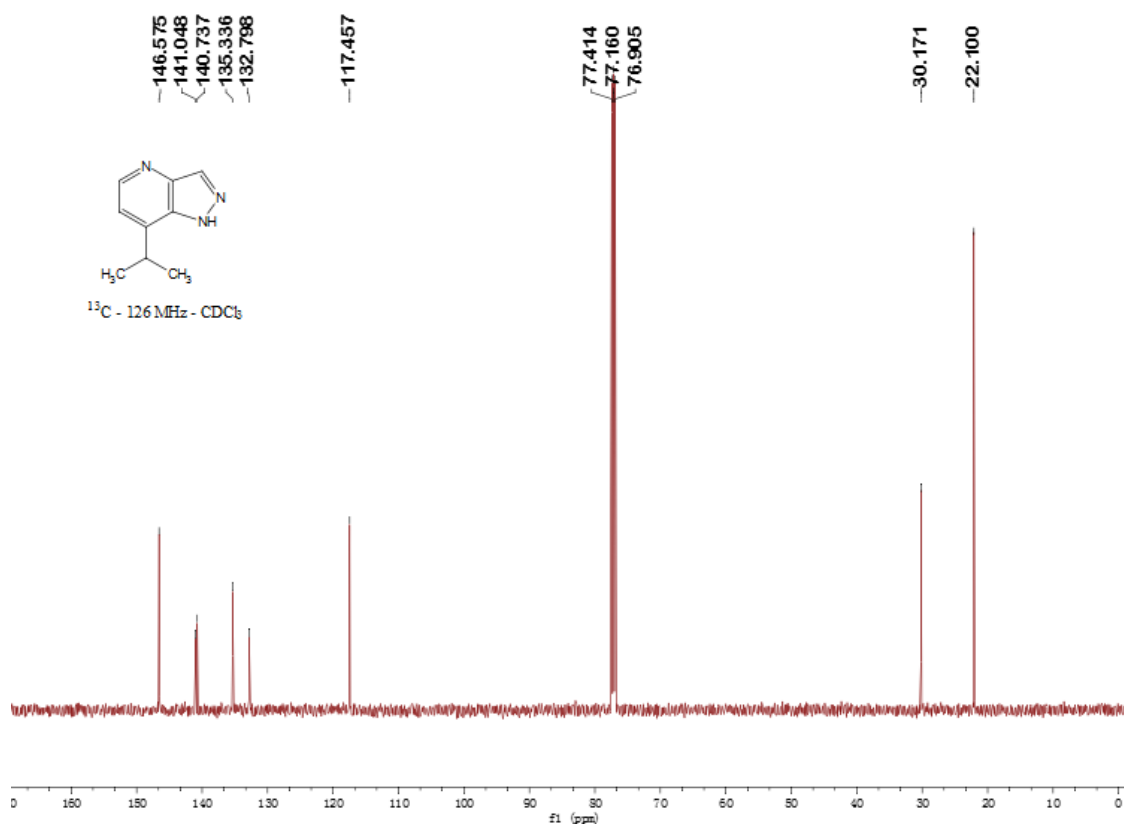

### 4,6-diisopropyl-imidazo[1,2-a]pyrimidine (**20**)

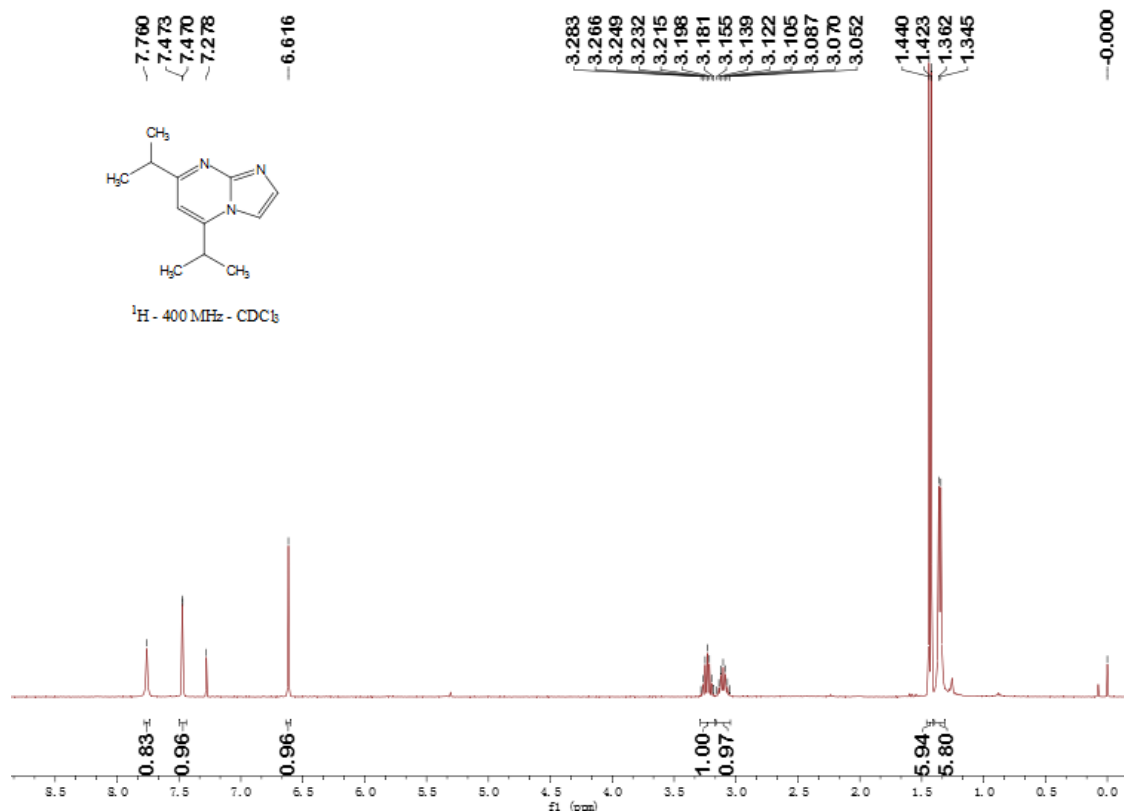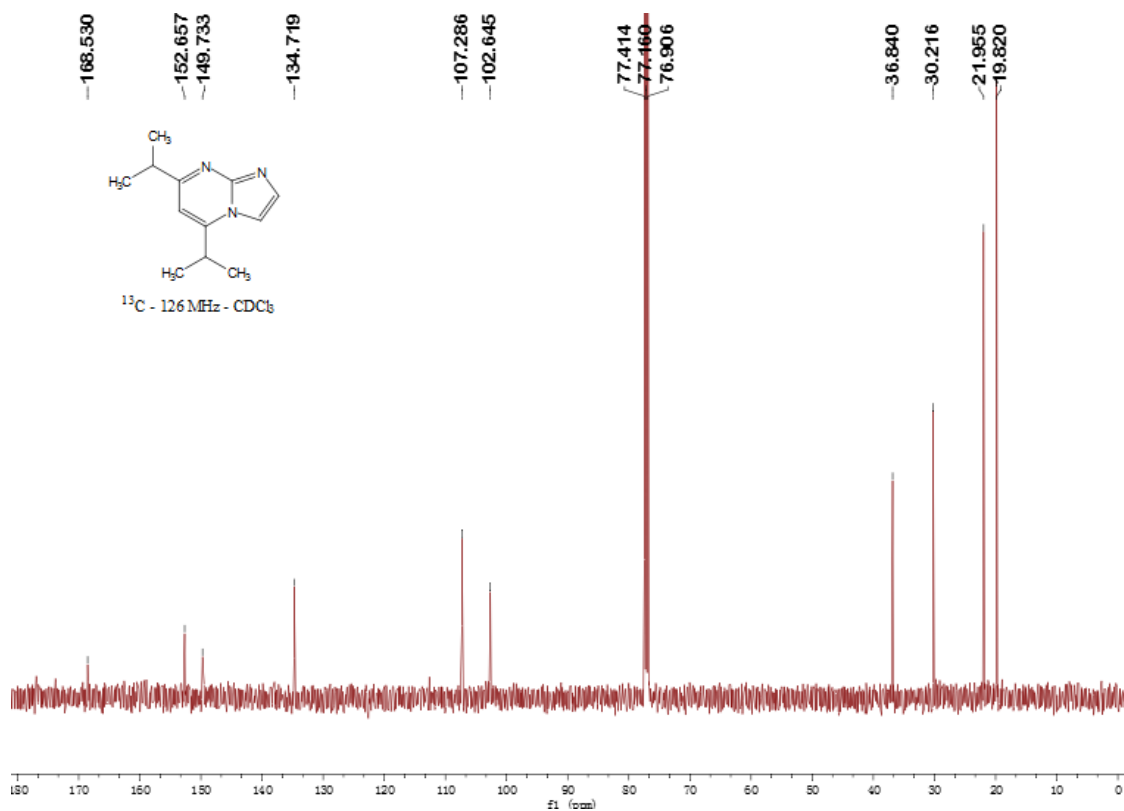



### 5,7-diisopropyl-pyrazolo[1,5-a]pyrimidine (21)

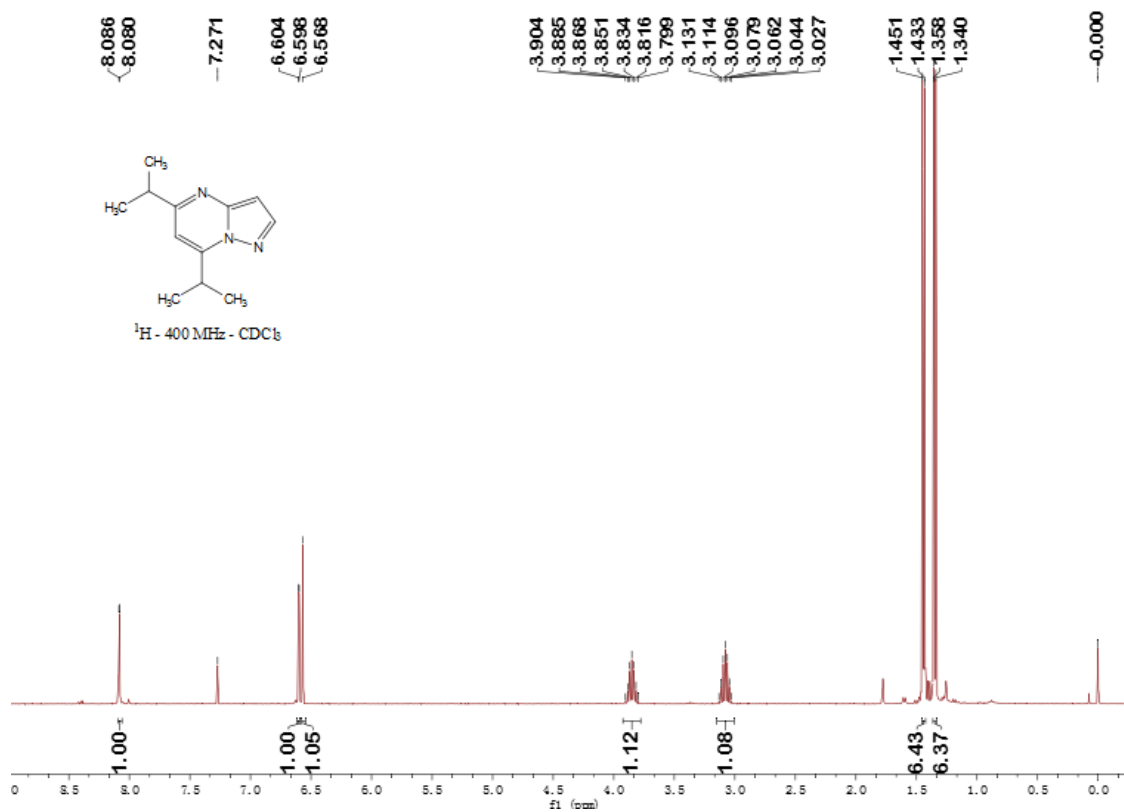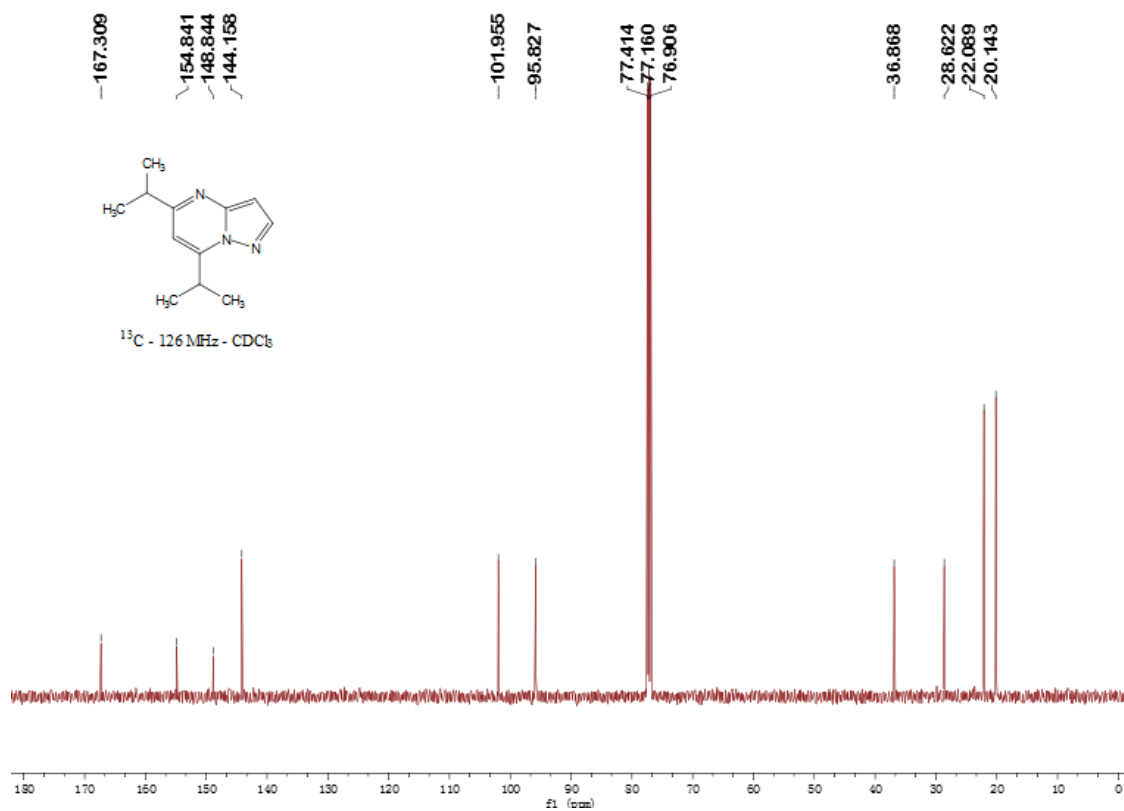

4,7-diisopropyl-imidazo[1,2-a]pyrazine (**22**)

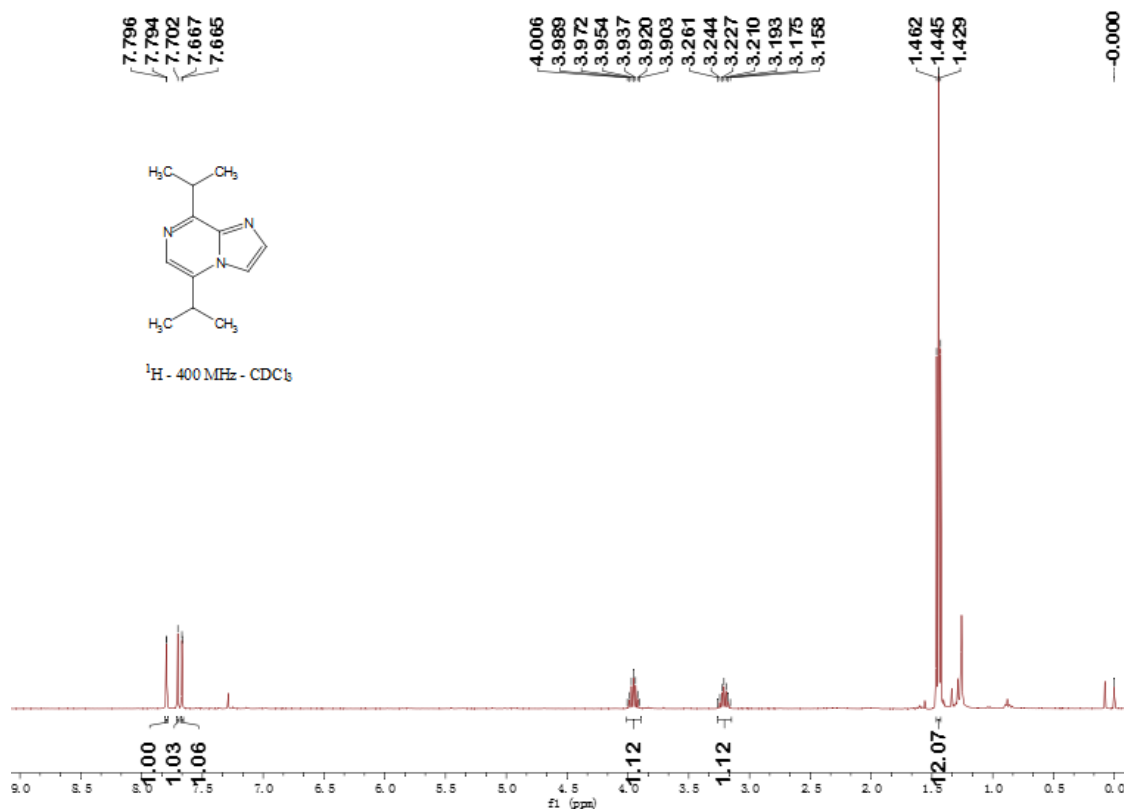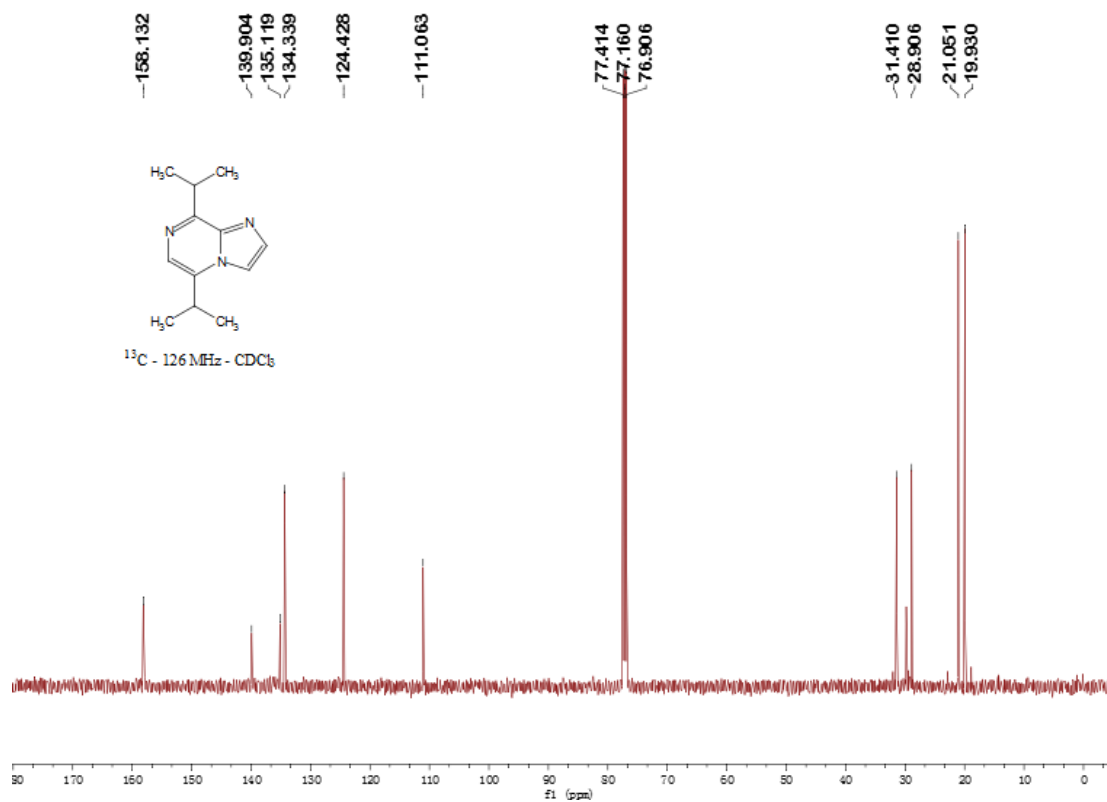

-The End-
